# Supplementary material for: Functional characterization of the diatom cyclin-dependent kinase A2 as a mitotic regulator reveals plant-like properties in a non-green lineage
Source: PubMed Central journal article supplement (PMC4392632; doi:10.1186/s12870-015-0469-6), 2015-03-14
Supplement: 12870_2015_469_MOESM6_ESM.pdf [file 12870_2015_469_MOESM6_ESM.pdf]

|                |             | 20          |             | 40            |             | 60           |                     | 80                     |
|----------------|-------------|-------------|-------------|---------------|-------------|--------------|---------------------|------------------------|
| Phatr_CDKC2    | FTKKHQVGGQ  | TYGSVFVGQD  | KTIVALKRIN  | TKEENGFPIT    | ALREVKILKV  | LHPNIVTLKE   | IVVFMVFEYL          | EDLTGVLEVK 80          |
| Thaps_CDKC2    | FQKKHQVGEG  | TYGSVFVGAD  | KTVVALKRIN  | TEEENGFPIT    | AIREVKILKA  | LHDNIVQLKE   | IVVFMVFEYL          | EDLTGIIIEIK 80         |
| Outgroup       | FEKLNRI GEG | TYGI VYRRAR | TTIVALKKVR  | MDEKDGIPIS    | SLREITLLR   | LHPNIVELKE   | VVIFLVMGYC          | EDLASLELVK 80          |
| Phatr_CDKC1    | YERQEIGEG   | TYGQVYRARC  | KTVVALKKMR  | MHGGYGMP LQ   | FIREIKILKK  | LHPNLLQMI E  | VVFLVLVEYV          | SDLTGLMDVK 80          |
| Thaps_CDKC1    | YCRLEQIGEG  | TYGQVYRAKC  | LTMVALKKIR  | LQSGHGIPPT    | VLREIKILKK  | LHKAMVKMYE   | VVFLFLSLEYI         | SDLTGLLDVK 80          |
| Ostta_CDKC     | YEKLEQIGEG  | TYGQVYMARC  | KTIVALKKIR  | MDEKEGFPIT    | AIREIKILKK  | LHRNVVDLKE   | IVIYLVFEYM          | DDLTGLAEIK 80          |
| Arath_CDKC1    | FEKLEQIGEG  | TYGQVYMAKE  | ITIVALKKIR  | MDEREGFPIT    | AIREIKILKK  | LHENVIQLKE   | IVIYMVFEYM          | DDLTGLADIK 80          |
| Arath_CDKC2    | FEKLEQIGEG  | TYGQVYMAKE  | ITIVALKKIR  | MDEREGFPIT    | AIREIKILKK  | LHENVIHLKE   | IVIYMVFEYM          | DDLTGLADIK 80          |
| Arath_CDKC1    | YKLVGKIGEG  | TYGLVFLART  | KPIIAIKKKF  | QSDGDGVSPT    | AIREIMLLRE  | IHENNVKLVN   | VILYLAFDYA          | EDLYEIRVK 80           |
| Phatr_CDKD1    | YKVLKALGQ   | TWGVVHKAQ   | KSVVAIKKIK  | SEPEEGVNFT    | AVREIKLLRE  | FHENIVELVD   | CFVCLVYECA          | FDLEKILGK 80           |
| Thaps_CDKD1    | YEVIKALGQ   | TWGVVHMAKQ  | RTIVALKKIK  | SEPEEGVNFT    | AIREIKLLRE  | FHENI IELVD  | VFVCLVYECA          | DDLEKILKTK 80          |
| Arath_CDK7     | YAKLSFLGEG  | QFATVYKARD  | TTIVAVKKIK  | KGARDGINRT    | ALREIKILQE  | LHENI IGLVD  | VFVSLVDFDM          | DDLEVI I KIK 80        |
| Xenla_CDK7     | YEKLDLFLGEG | QFATVYKARD  | KTIVAIKKIK  | LGANDGINRT    | ALREIKLLQE  | LHPNI IGLLD  | AFISLVDFDM          | EDLEVI I KIK 80        |
| Homsa_CDK7     | YEKLDLFLGEG | QFATVYKARD  | KTIVAIKKIK  | LGAKDGINRT    | ALREIKLLQE  | LHPNI IGLLD  | AFISLVDFDM          | EDLEVI I KIK 80        |
| Ostta_CDKD     | YERGRTL GEG | TYGVVHEARV  | KTVVAIKKIR  | LGLKEGVNFT    | AIREIKLLQE  | IHEHVIELVD   | VFLNLVFEYC          | GDLEMYIKVK 80          |
| Arath_CDKD1;1  | YLKREVLGQ   | TYGVVFKATD  | TNTVAIKKIR  | LGEKEGVNFT    | ALREIKLLKE  | LHPHI IELID  | AFLHIVFEFM          | EDLEAVIRVK 80          |
| Arath_CDKD1;2  | YLRRQILGEG  | TYGVVYKATD  | TTTVAVKKIR  | LGQKEGVNFT    | ALREIKLLKE  | LHPHIVELID   | AFLHLVFEYM          | QDLEAVIRIK 80          |
| Drome_CDK4     | YQELNII GEG | AYGTVYRRAR  | TTIVALKKVR  | ISNENGVPM S   | TLREISLLKQ  | LHANIVKLYE   | VCILLVFEHV          | DDVSDLIDIQ 80          |
| Homsa_CDK6     | YECVAEIGEG  | AYGKVFKAAR  | LNFVALKVR   | VQGEENGMP L S | TLREIVAVLRH | LHPNVVRLFD   | VCLTLVFEHV          | DDLTTLVDIK 80          |
| Xenla_CDK4     | YEPVAEIGEG  | AYGTVYKARD  | LSFVALKNVR  | VQNGENGLP L S | TIREVTLTKR  | LHPNIVKLMD   | VCVTLVFEHV          | DDLTKYLSIK 80          |
| Homsa_CDK4     | YEPVAEIGEG  | AYGTVYKARD  | PSFVALKSVR  | VPGGGGLPIS    | TVREVALLR   | LHPNVVRLMD   | VCVTLVFEHV          | DDLRTYLDIK 80          |
| Cyame_CDKB     | FRRLEVLGQ   | TYGTVYKALD  | LTIVALKKTT  | LSDDEGIPAT    | TLREVSILRA  | LCENIVKLID   | VILYLVFEYA          | EDLKQYMNK 80           |
| Arath_CDKB2;1  | FEKLEKVGEG  | TYGKVYRARE  | KTIVALKKTR  | LHDEEGVPST    | TLREISILRM  | LDPHVRLMD    | VQLYLVFEYM          | DDVKKFIRIK 80          |
| Arath_CDKB2;2  | FEKLEKVGEG  | TYGKVYRARE  | KTIVALKKTR  | LHDEEGVPST    | TLREISILRM  | LDPHIVRLMD   | VQLYLVFEYV          | DDLKKFIRVK 80          |
| Chlre_CDKB     | YEKIEKIGEG  | TYGKVYKARD  | ITLVALKKCR  | LEEEEGVPST    | TLREISLLQM  | LSNHIVKLLC   | VELYLVFEYL          | NDMKKWM DIK 80         |
| Arath_CDKB1;1  | YEKLEKVGEG  | TYGKVYKAME  | KTLVALKKTR  | LEDEEGIPPT    | ALREISLLQM  | LTSYVVRLLC   | VELYLVFEYL          | DDLKKFIDIQ 80          |
| Arath_CDKB1;2  | YEKLEKVGEG  | TYGKVYKAME  | KTLVALKKTR  | LEDEEGIPPT    | ALREISLLQM  | LQSYIVRLLC   | VELYLVFEYL          | DDLKKFIDVQ 80          |
| Miccp_CDKB     | YEKLEKIGQ   | TYGKVYKARD  | RTLVALKKTR  | LEEEEGVPST    | ALREVSLLQM  | LSAFVVRLLK   | VELYLVFEYL          | DDLKNFMDVQ 80          |
| Micpu_CDKB     | YEKLEKIGQ   | TYGKVYKARD  | RTLVALKKTR  | LEEEEGVPST    | ALREVSLLQM  | LSAFIVRLLK   | VELYLVFEYL          | DDLKNFMDVQ 80          |
| Ostlu_CDKB     | YEKLEKIGQ   | TYGKVYKARE  | RNLVALKKTR  | LEEEEGVPST    | ALREVSLLQM  | LSPYIVRLLR   | VELYLVFEFL          | DDLKKYMDVQ 80          |
| Ostta_CDKB     | YEKLEKIGQ   | TYGKVYKARD  | RTLVALKKTR  | LEEEEGVPST    | ALREVSLLQM  | LSPYIVRLLR   | VELYLVFEFL          | DDLKKYMDVQ 80          |
| Cyame_CDKA     | YQRLERIGEG  | TYGVYRRAR   | RTLVALKKIR  | LEEEEGVPST    | ALREIAILRE  | LQPNVVRLLD   | VVLVLFVEHL          | DDLKRYMDAK 80          |
| Physo_CDKA2    | YQRIEKIGEG  | TYGVVYKSLD  | LTVVALKRIR  | LEEDDGIPST    | ALREISVLRE  | LHPNIVSLLD   | CLLFLVFEFM          | DDLKRFFMEIK 80         |
| Ectsi_CDKBlike | YTKQEKAGQ   | TYGVVYKSWD  | NTFVALKKIK  | VEEDDGIPGT    | ALREISLLKE  | LHPNIVELKN   | CVLWLI FEWV         | DDLKRYMNIK 80          |
| Nanga_CDKA2    | YQKIEKL GEG | TYGVVYKARD  | KTIVALKRIR  | LEEDDGIPST    | ALREISLLQE  | LHPCIVELLD   | CVLYLVFEFV          | DDLKKYMEVK 80          |
| Ectsi_CDKB     | YQKIEKL GEG | TYGVVYKARD  | KTIVALKRIR  | LEEDDGIPST    | ALREISLLRE  | LHPNIVELKD   | CVLYLVFEFV          | DDLKKYMEVK 80          |
| Phatr_CDKA2    | YHKIEKL GEG | TYGVVYKARD  | RTIVALKRIR  | LEEDDGIPST    | ALREISLLRE  | LHPNIVDLKD   | CVLYLVFEFL          | DDLKKYMEIK 80          |
| Thaps_CDKA2    | YQKIEKL GEG | TYGVVYKARD  | RTIVALKRIR  | LEEDDGIPST    | ALREISLLRE  | LHENIVDLKD   | CVLYLVFEFL          | DDLKKALEVK 80          |
| Fracy_CDKA2    | YQKIEKL GEG | TYGVVYKARD  | RTIVALKRIR  | LEEDDGIPST    | ALREISLLRE  | LHENVVELMD   | CVLYLVFEFL          | DDLKKYMEVK 80          |
| Nanga_CDKA1;2  | FTNIQQIGEG  | TYGI VYKATT | SNLIALKKIR  | LADEEGVPST    | AIREISLLKE  | LHPNVVTLKD   | VILYLVFEYL          | DDLKRYMDVK 80          |
| Physo_CDKA1;2  | YQKVEKVGEG  | TYGI VYKARD | LTIVALKKIR  | LEDEEGIPST    | AMREISLLKE  | LHPNVVLYD    | AVLYLVFEFV          | EDLKRCLEVK 80          |
| Sacce_CDC28    | YKRLEKVGEG  | TYGVVYKALD  | LPVVALKKIR  | LEDEEGVPST    | AIREISLLKE  | LDDNIVRLYD   | IVLYLVFEFL          | DDLKRYMEVK 80          |
| Ectsi_CDKA     | YQKLEKIGEG  | TYGVVYKARD  | RTI IALKKIR | LEDEEGIPST    | AIREISLLKQ  | LHPNIVRL - - | - - - - - - - - - - | - - - - - - - - - - 58 |
| Nanga_CDKA1;1  | YQKLEKIGEG  | TYGVVYKARD  | RTI IALKKIR | LEDEEGIPST    | AIREISLLKE  | LHPNIVRLYD   | VVLTLVFEYL          | DDLKKYLDLQ 80          |
| Physo_CDKA1;1  | YQKLEKIGEG  | TYGVVYKARD  | RTI IALKKIR | LEDEEGIPST    | AIREISLLKE  | LHCNIVRLYN   | IVLTLVFEYL          | DDLKKYLDLK 80          |
| Thaps_CDKA1    | YQKMEKIGEG  | TYGVVYKARD  | RSI IALKKIR | LEDEEGIPST    | AIREISLLKE  | LHPNIVRLYD   | VVLTLVFEFL          | DDLKKYLDLK 80          |
| Phatr_CDKA1    | YQKMEKIGEG  | TYGVVYKARD  | RTI IALKKIR | LEDEEGIPST    | AIREISLLKE  | LHPNIVRLYD   | VVLTLVFEFL          | DDLKKYLDLK 80          |
| Fracy_CDKA1    | YQKMEKIGEG  | TYGI VYKARD | RTI IALKKIR | LEDEEGIPST    | AIREISLLKE  | LHPNIVRLYD   | VVLTLVFEFL          | DDLKKYLDLK 80          |
| Drome_CDK2     | FEKIEKIGEG  | TYGVVYKGRN  | RTIVAMKKIR  | LEDEEGVPST    | AIREISLLKE  | LHENIVCLD    | VLIYLI FEFL         | SDLKKYMDVR 80          |
| Xenla_CDK1     | YTKIEKIGEG  | TYGVVYKGRH  | KTVVAMKKIR  | LEEEEGVPST    | AIREISLLKE  | LHPNIVCLLD   | VLLYLI FEFL         | SDLKKYLDVK 80          |
| Homsa_CDK1     | YTKIEKIGEG  | TYGVVYKGRH  | KTVVAMKKIR  | LEEEEGVPST    | AIREISLLKE  | LHPNIVSLQD   | VLLYLI FEFL         | SDLKKYLDVK 80          |
| Schpo_CDC2     | YQKVEKIGEG  | TYGVVYKARH  | KSIVAMKKIR  | LESEEGVPST    | AIREISLLKE  | VDENCVRLLD   | ILLYLVFEFL          | DDLKKYMDVQ 80          |
| Xenla_CDK2     | FQKVEKIGEG  | TYGVVYKARN  | RTIVALKKIR  | LDETEGVPST    | AIREISLLKE  | LHPNIVKLLD   | VILYLVFEFL          | NDLKKFMDVK 80          |
| Homsa_CDK2     | FQKVEKIGEG  | TYGVVYKARN  | KTVVALKKIR  | XDETEGVPST    | AIREISLLKE  | LHPNIVKLLD   | VILYLVFEFL          | HDLKKFMDIK 80          |
| Ostta_CDKA     | YEKVAKIGEG  | TYGVVYKAKS  | LDMVALKRIR  | LDDDEGVPST    | AIREISLLKE  | LHENVVSLL E  | VILYLVFEYL          | DDLKKHMDIK 80          |
| Ostlu_CDKA     | YEKVLKIGEG  | TYGVVYKAKN  | LDMVALKRIR  | LDDDEGVPST    | AIREISLLKE  | LHENVVSLL E  | VILYLVFEYL          | DDLKKHMDVK 80          |
| Miccp_CDKA     | FEKVEKIGEG  | TYGVVYKARD  | RDVVALKRIR  | LDEEEGVPST    | AIREISLLKE  | LHENIVSLMD   | VILYLVFEFL          | DDLKKHLDIK 80          |
| Micpu_CDKA     | FEKVEKIGEG  | TYGVVYKARN  | RNVVALKRIR  | LEEEEGVPST    | AIREISLLKE  | LHENIVSLMD   | VILYLVFEHL          | DDLKKHLDIK 80          |
| Chlre_CDKA     | YEKLERAGEG  | TYGVVFKARD  | RTIVALKKIR  | LEDEEGVPST    | AIREISFLKE  | LHDNVVRLYD   | VLLYLVFEFL          | DDLKKQMDIK 80          |
| Arath_CDKA1    | YEKVEKIGEG  | TYGVVYKARD  | KTTIALKKIR  | LEDEEGVPST    | AIREISLLKE  | MHSNIVKLQD   | VVLYLVFEYL          | DDLKKHMDIK 80          |

|                |                 | 100            |                 | 120           |                    | 140           |               | 160                |
|----------------|-----------------|----------------|-----------------|---------------|--------------------|---------------|---------------|--------------------|
| Phatr_CDKC2    | SWSQQLLVGH      | YMHV IHRDLK    | ASNLL I LKIA    | DWGLARSWNS    | EMLTNKV I TL       | WYRPP ELLLG   | YTDK I DMWSV  | GC I I AEMFRS 160  |
| Thaps_CDKC2    | SWSKQLLVGH      | YMH I IHRDLK   | SSNLL I LKIA    | DWGLARSWNS    | EMLTNRV I TL       | WYRPP ELLLG   | YSTK I DMWSV  | GC I I AEMFRG 160  |
| Outgroup       | C I V LQVLGLQ   | Y L H I IHRDLK | VSNLLMVKTA      | D FGLARAYGV   | PVMTPKVVTL         | WYRAPELLLG    | QTTS I DMWAV  | GC I LAELLHR 160   |
| Phatr_CDKC1    | C I FRQLLACA    | YMHYVHRDLK     | SSNLLVVKLA      | D FGLARNIEP   | PFFT NKV I TL      | WYRPP EILT G  | YGPADVWSA     | GC I LAELLGK 160   |
| Thaps_CDKC1    | SVVQQLLVLE      | FMHYVHRDLK     | SSN I L I VKLA  | D FGLARCLEG   | - - F T N K V I TL | WYRPP ELLLG   | YGTAVD IWSA   | GC I LAEVI GR 158  |
| Ostta_CDKC     | CYMKQLLGLH      | YCH I LHRDI K  | GSNLL I LKLA    | D FGLAKP I TN | ENLTNRV I TL       | WYRPP ELLLG   | YGPSVDMWSA    | GC I FAEL I GK 160 |
| Arath_CDKC1    | CYMKQLLGLH      | YCHV LHRDI K   | GSNLL I LKLA    | D FGLARSYSH   | DHLTNRV I TL       | WYRPP ELLLG   | YGP A I DMWSV | GC I FAELLAK 160   |
| Arath_CDKC2    | CYMKQLLGLH      | YCHV LHRDI K   | GSNLL I LKLA    | D FGLARSYSH   | DHLTNRV I TL       | WYRPP ELLLG   | YGP A I DMWSV | GC I FAELLGK 160   |
| Arath_CDEK1    | SLLWQLLGLN      | Y L H I IHRDLK | PSN I L VVKIA   | D FGLAR I YQA | PLLSDNVVT I        | WYRAPELLLG    | YTSAVDMWAV    | GC I FAELL LK 160  |
| Phatr_CDKD1    | QHLLSLLA I S    | ACH I LHRDLK   | PDNMLFMKLA      | D FGLARMHGT   | PKLSPQA I TL       | WYKPP ELLLG   | YSSSADMWSV    | GC I FAELLRR 160   |
| Thaps_CDKD1    | QHLLTLLA I S    | ACH I LHRDLK   | PDNCLFMKLA      | D FGLARMYGT   | PKLSPQA I TL       | WYKPP ELLLG   | YSSAAD IWSV   | GC I FAELLRR 160   |
| Arath_CDK7     | AYA IMTLGL E    | Y L H I LHRDLK | PNNLLVLK I G    | D FGLAKSFGS   | PNYTHHVVT R        | WYRSP ELLFG   | YGTGVDMWAV    | GC I LAELMRV 160   |
| Xenla_CDK7     | SYMLMTLGL E     | Y L H I LHRDLK | PNNLLLLKLA      | D FGLAKSFGS   | PNYTHQVVT R        | WYRSP ELLFG   | YGVGVDMWAV    | GC I LAELLRV 160   |
| Homsa_CDK7     | AYMLMTLGL E     | Y L H I LHRDLK | PNNLLLLKLA      | D FGLAKSFGS   | PNYTHQVVT R        | WYRAPELLFG    | YGVGVDMWAV    | GC I LAELLRV 160   |
| Ostta_CDKD     | SYARMTLAVA      | HCHV LHRDLK    | PNNLL I LKLA    | D FGLAR I FGS | PDFTHQVFAR         | WYRAPELLLG    | YGP GVDWAV    | GC I LAELMRV 160   |
| Arath_CDKD1;1  | SYLQMILGL E     | YCHV LHRDMK    | PNNLL I LKLA    | D FGLAR I FGS | PGFTHQVFAR         | WYRAPELLFG    | YDGAVDVWAA    | GC I FAELLRR 160   |
| Arath_CDKD1;2  | SYMLMTLGLA      | YCHV LHRDMK    | PNNLL I LKLA    | D FGLARLFGS   | PNFTHQVFAT         | WYRAPELLFG    | YGAGVDVWAA    | GC I FAELLRR 160   |
| Drome_CDK4     | RLSRELLGVD      | FLH I IHRDLK   | PQNLLVLK I A    | D FGLAKTYGS   | EMLTSVVVT L        | WYRAPEVLL -   | YNSTVD IWSA   | AC I I FEMFRR 159  |
| Homsa_CDK6     | DMMFQLLGLD      | FLHV LHRDLK    | PQN I L V I KLA | D FGLAR I YSF | QMLTSVVVT L        | WYRAPEVLLQ    | YATPVDLWSA    | GC I FAEMFRK 160   |
| Xenla_CDK4     | DLMKQFLGLE      | FLH I VHRDLK   | PEN I L VVKLA   | D FGLAR I YSC | QMLTPVVVT L        | WYRAPEVLLQ    | YATPVDMWSV    | GC I FAEMFRK 160   |
| Homsa_CDK4     | DLMRQFLGLD      | FLH I VHRDLK   | PEN I L VVKLA   | D FGLAR I YSY | QMLTPVVVT L        | WYRAPEVLLQ    | YATPVDMWSV    | GC I FAEMFRK 160   |
| Cyame_CDKB     | CFAYQMLGLQ      | FCH I MHRDLK   | PQN I L V I KLA | D FGLGRAFC I  | PVYTHEVVT L        | WYRAPE I LLG  | YSTPVD IWSV   | GC I LAEMI GR 160  |
| Arath_CDKB1;1  | RLSMQLCGMA      | FCH I LHRDLK   | PHNLLMLK I A    | DLGLARAFTL    | PMYTHE I LTL       | WYRAPEVLLG    | YSTAVDMWSV    | GC I FAELVNQ 160   |
| Arath_CDKB2;2  | CLMYQLCGMA      | FCHV LHRDLK    | PHNLLMLK I A    | DLGLARAFTL    | PMYTHE I LTL       | WYRAPEVLLG    | YSTGVDMWSV    | GC I FAELVKQ 160   |
| Chlre_CDKB     | SMVYQL I GVA    | YCHV LHRDLK    | PQNLLVLKVA      | DLGLGRHFSV    | PLYTHE I VTL       | WYRAPEVLLG    | YATPVDMWSV    | GC I FAELVKA 160   |
| Arath_CDKB1;1  | KLMFQLCGVA      | HCHV LHRDLK    | PQNLLVLK I A    | D FGLARAFTV   | PLYTHE I VTL       | WYRAPEVLLG    | YSTGVDMWSV    | GC I FAEMVRQ 160   |
| Arath_CDKB1;2  | RFMFQLFGVA      | HCHV LHRDLK    | PQNLLVLK I A    | DLGLGRAFTV    | PLYTHE I VTL       | WYRAPEVLLG    | YSTAVD IWSV   | GC I FAEMI RQ 160  |
| Micsp_CDKB     | DFMYQLCGCA      | HLHV MHRDLK    | PQNLLV I KVA    | DLGLGRAFSV    | PVYTHE I VTL       | WYRAPEVLLG    | YSTPVD IWSV   | GC I FAELAKQ 160   |
| Micpu_CDKB     | DFMYQLCGCA      | HLHV MHRDLK    | PQNLLV I KVA    | DLGLGRAFSV    | PVYTHE I VTL       | WYRAPEVLLG    | YSTPVD IWSV   | GC I FAELAKQ 160   |
| Ostlu_CDKB     | NMYMYQLCGCA     | HLHV MHRDLK    | PQNMLVLK I A    | DLGLGRAFSV    | PVYTHE I VTL       | WYRAPEVLLG    | YSTPVDMWSV    | GCMFAEMAKQ 160     |
| Ostta_CDKB     | NMYMYQLCGCA     | HLHV MHRDLK    | PQNMLVLK I A    | DLGLGRAFSV    | PVYTHE I VTL       | WYRAPEVLLG    | YSTPVDMWSV    | GCMFAEMAKQ 160     |
| Cyame_CDKA     | SFLYQL I GVA    | Y L H I LHRDLK | PQNLL I LKLA    | D FGLARA FGI  | PVMTSEV I TL       | WYRAPE I LLG  | YAAPVDMWSV    | GC I FAEMMRK 160   |
| Physo_CDKA2    | SLLYQLLGLA      | FSH I MHRDLK   | PQNLLVLK I A    | D FGLARA FSL  | PIYTHEVVT L        | WYRAPE I LLG  | YCPPVD IWSV   | GV I FAEMVKK 160   |
| Ectsi_CDKBlike | SYMFMMALE       | FCH I MHRDLK   | PQNLLVLK I A    | D FGLARAFCP   | PVLTHEVVT I        | WYRAPE I LLG  | YAPPLDLWSV    | GT I LAEMVKT 160   |
| Nanga_CDKA2    | SFLFQ I FGLA    | FCH I MHRDLK   | PQNLLVLK I A    | D FGLARAFCP   | P I LTHEVVT L      | WYRPP E I LLG | YAPPDVVAC     | GA I FVELLKR 160   |
| Ectsi_CDKB     | SFLYQLMGLA      | FCHV MHRDLK    | PQNLLVLKLA      | D FGLARAFCP   | P I LTHEVVT L      | WYRAPE I LLG  | YAPPVDLWAV    | GT I LVEMVKK 160   |
| Phatr_CDKA2    | SYTFQCLGLA      | FCHV MHRDLK    | PQNLLVLK I A    | D FGLARAFCP   | P I LTHEVVT L      | WYRPP E I LLG | YAPPMDVWA I   | GA I LVEMI KR 160  |
| Thaps_CDKA2    | SYLFQMCGLA      | FCHV MHRDLK    | PQNLLVLKLA      | D FGLARAFCP   | P I LTHEVVT L      | WYRPP E I LLG | YAPPVDVWA I   | GT I FVEMVKK 160   |
| Fracy_CDKA2    | SYLFQ I CGLA    | FCHV MHRDLK    | PQNLLVLKLA      | D FGLARAFCP   | P I LTHEVVT L      | WYRPP E I LLG | YAPPVDVWA I   | GA I FVEMVKK 160   |
| Nanga_CDKA1;2  | SYLHQMI GVA     | FCHV LHRDLK    | PQNLL I LKLA    | D FGLARA FNV  | PLYTREVVTL         | WYRAPE I LLG  | YSTPVD TWS I  | GC I FAEM LKE 160  |
| Physo_CDKA1;2  | SYLYQLL G I A   | FCHV LHRDLK    | PQNLL I LKLG    | D FGLAREYGV   | PLYTHEVVT L        | WYRAPEVLLG    | YSTPVD SWS I  | GC I FAEMVKK 160   |
| Sacce_CDC28    | KFMMQLCG I A    | YCH I LHRDLK   | PQNLL I LKLG    | D FGLARA FGV  | PLYTHE I VTL       | WYRAPEVLLG    | YSTGVD TWS I  | GC I FAEMCRK 160   |
| Ectsi_CDKA     | - - - - -       | - - - - -HRDLK | PQNLL I LKLA    | D FGLARA FGI  | PVYTHEVVT L        | WYRAPDVLMG    | YSTPVD IWS I  | GC I FAEMAGR 123   |
| Nanga_CDKA1;1  | SFLYQLL GVA     | FCHV LHRDLK    | PQNLL I LKLA    | D FGLARA FGI  | PVYTHEVVT L        | WYRAPDVLMG    | YSTPVD IWS I  | GC I FAEMAGR 160   |
| Physo_CDKA1;1  | SFLYQLL G I A   | YCHV LHRDLK    | PQNLL I LKLG    | D FGLARA FGI  | PVYTHEVVT L        | WYRAPDVLMG    | YSTPVD IWSV   | GC I FAEMAGG 160   |
| Thaps_CDKA1    | SFLYQLL GVA     | YCHV LHRDLK    | PPNLL I LKLA    | D FGLARA FGI  | PVYTHEVVT L        | WYRAPDVLMG    | YSTPVD IWSV   | GC I FAEMVGR 160   |
| Phatr_CDKA1    | SFLYQLL GVA     | YCHV LHRDLK    | PPNLL I LKLA    | D FGLARA FGI  | PVYTHEVVT L        | WYRSPDVLMG    | YSTPVD IWSV   | GC I FAEMAGR 160   |
| Fracy_CDKA1    | SFLYQLL GVA     | YCHV LHRDLK    | PPNLL I LKLA    | D FGLARA FGI  | PVYTHEVVT L        | WYRAPDVLLG    | YSTPVD IWSV   | GC I FAEMAGR 160   |
| Drome_CDK2     | SYLYQITAIL      | FCHV LHRDLK    | PQNLL I I KVA   | D FGLGRSFGI   | PVYTHE I VTL       | WYRAPEVLLG    | YSCPVD IWS I  | GC I FAEMARK 160   |
| Xenla_CDK1     | SYLYQILG I V    | FCHV LHRDLK    | PQNLL I I KLA   | D FGLARA FGI  | PVYTHEVVT L        | WYRAPEVLLG    | YSTPVDVWS I   | GT I FAE I AKK 160 |
| Homsa_CDK1     | SYLYQILG I V    | FCHV LHRDLK    | PQNLL I I KLA   | D FGLARA FGI  | P I YTHEVVT L      | WYRSP E VLLG  | YSTPVD IWS I  | GT I FAELAKK 160   |
| Schpo_CDC2     | KFTYQLGVGN      | FCH I IHRDLK   | PQNLL I LKLA    | D FGLARSFGV   | PLYTHE I VTL       | WYRAPEVLLG    | YSTGVD IWSV   | GC I FAEMI RS 160  |
| Xenla_CDK2     | SYLFQLLGLA      | FCHV LHRDLK    | PQNLL I I KLA   | D FGLARA FGV  | PVFTHEVVT L        | WYRAPE I LLG  | YSTAVD IWSL   | GC I FAEMI RR 160  |
| Homsa_CDK2     | SYLFQLLGLA      | FCHV LHRDLK    | PQNLL I I KLA   | D FGLARA FGV  | PVYTHEVVT L        | WYRAPE I LLG  | YSTAVD IWSL   | GC I FAEMVRR 160   |
| Ostta_CDKA     | GYVYQ I C G I A | FCHV LHRDLK    | PQNLL I LKLA    | D FGLARA FGI  | PVYTHEVVT L        | WYRAPE I LLG  | YSTPVDVWS I   | GC I MAEMVHA 160   |
| Ostlu_CDKA     | GYVYQ I C G I A | FCHV LHRDLK    | PQNLL I LKLA    | D FGLARA FGI  | PVYTHEVVT L        | WYRAPE I LLG  | YSTPVDVWS I   | GC I FAEMI GK 160  |
| Micsp_CDKA     | GYLYQMCG I A    | YCHV LHRDLK    | PQNLLVLKLA      | D FGLARA FGI  | PLYTHEVVT L        | WYRSP E I LLG | YSTPVDVWS I   | GC I FAEMI HA 160  |
| Micpu_CDKA     | GYLYQMCGVA      | YCHV LHRDLK    | PQNLLVLKLA      | D FGLARA FGI  | PVYTHEVVT L        | WYRSP E I LLG | YSTPVDVWS I   | GC I FAEMI HA 160  |
| Chlre_CDKA     | MYMWQMLG I A    | FCH I LHRDLK   | PQNLL I LKLA    | D FGLARA FGI  | PVYTHEVVT L        | WYRAPE I LLG  | YSTPVD IWS I  | GC I FAEMVHR 160   |
| Arath_CDKA1    | TYLYQ I L G I A | YCHV LHRDLK    | PQNLL I LKLA    | D FGLARA FGI  | PVFTHEVVT L        | WYRAPE I LLG  | YSTPVD IWSV   | GC I FAEMI QK 160  |

|                |            |             |            |               |             |             |            |
|----------------|------------|-------------|------------|---------------|-------------|-------------|------------|
|                |            | 180         |            | 200           |             | 220         |            |
| Phatr_CDKC2    | GFLKGSNEAT | QLLI FRTCGH | PTKEWPSLGD | KRLWFPLKLP    | PAIELIKLMA  | LNPWSAEHA   | LDAEYF 226 |
| Thaps_CDKC2    | GLLKGSSEAS | QLLI FRVMGH | PTTEWPNINK | MPLWLPLRLP    | AAMDMINLLA  | YNPRWSAAQA  | LTAEWF 226 |
| Outgroup       | PLLPGTSEIH | QLLI VQLLGT | PSENWPGFSK | LPLVYSLKFP    | LGLRLLFLFM  | YDPRATAGDC  | LESSYF 226 |
| Phatr_CDKC1    | PLLPKGSDLE | QLLI ADMLGT | PAPWDYLLSS | MKRVLDLYAA    | IAMNLLKLLA  | WDPRLTATGA  | LQNKYF 226 |
| Thaps_CDKC1    | PMFTGKTDM  | QLLI FDLIGT | PTDKWEGFRQ | LKLIIDLKYS    | KALNLLKLLA  | LDPRISARGA  | LTHRYF 224 |
| Ostta_CDKC     | PILPGKSEME | QMIIFKLCGS  | PTPEWPDADK | LPYAFTLVFS    | FAKDLLKFLT  | LDPRISAKDA  | LMHDWF 226 |
| Arath_CDKC1    | PILPGKNEQE | QLKIFELCGS  | PDEKWPGVSK | MPWFFKVFFR    | FALELLKMLV  | LDPRISAKDA  | LDAEYF 226 |
| Arath_CDKC2    | PILPGKTENE | QLKIYELCGS  | PDESWPGVSK | MPWYMKVIYR    | FALELLKMLV  | LDPRISAKDA  | LDAEYF 226 |
| Arath_CDKC1    | PLFQGEAQLD | QLKIFKILGH  | PTMDWPTLVN | LPHWILQVHL    | QAYDLLKMLE  | YDPRITASQA  | LEHEYF 226 |
| Phatr_CDKD1    | PFLQGGTDL  | QLTI FTVFGT | PNETWADFQT | LPLCWDFI FT   | AAISLLSILV  | LDPRFTATQC  | LSHPYF 226 |
| Thaps_CDKD1    | PFLQGGSDVS | QLTI FQVFGT | PTETWPDHNT | LPLCWDFI FT   | ACLSLLSMLV  | LDPRITANAA  | LLHPYF 226 |
| Arath_CDK7     | PFMPGDSLD  | QLRIFSTLGT  | PTEAWPHLSK | LHDYFRLIFT    | ALIHLMRLFA  | MNPRVSCREA  | LSMPYF 226 |
| Xenla_CDK7     | PFLPGDSLD  | QLRIFETLGT  | PTEEWPGMSS | LPDYFKLIFI    | ALLELLGLFT  | FNPRCTASQA  | LRKRYF 226 |
| Homsa_CDK7     | PFLPGDSLD  | QLRIFETLGT  | PTEEWPGMCS | LPDYFKLIFS    | ALLDLIGLFL  | FNPRITATQA  | LKMKYF 226 |
| Ostta_CDKD     | PFFAGSSDID | QLKVYAALGT  | PTETWPGVSA | LPDFFILTFF    | ESLDLLRMLE  | YDPRITAAQA  | LEHPYF 226 |
| Arath_CDKD1;1  | PFLQGGSDID | QLKIFAAFGT  | PKADWPDMIC | LPDYYQLLLP    | VALDLLKMFT  | YDPRISIQQA  | LKHRYF 226 |
| Arath_CDKD1;2  | PFLPGSTEID | QLKIFQAFGT  | PVPSWSDMIY | LPDYFSLIFP    | AALDLLKMF I | YDPRITIQQA  | LDHRYF 226 |
| Drome_CDK4     | ALFPGDSEKN | QLRIFELTGR  | PTAQWPGVST | VALEFPFPCP    | LADDLLKMLS  | YDLRPSALAC  | LDHRYF 225 |
| Homsa_CDK6     | PLFRGSSDID | QLKILDVIGL  | PGEEWPRDVA | LPRQFHI FVT   | IGKDLLKCLT  | FNPRISAYSA  | LSHPYF 226 |
| Xenla_CDK4     | PLFCGNSEAD | QLKIFDLIGL  | PSEEWPGVDT | LRPSFSVFPV    | IGADLLAMLT  | FSPRISASDA  | LLHPFF 226 |
| Homsa_CDK4     | PLFCGNSEAD | QLKIFDLIGL  | PPEDWPRDVS | LPRGFVVVVP    | MGAQLLEMLT  | FNPRISAFRA  | LQHSYL 226 |
| Cyame_CDKB     | SLFCGESEIE | QLAIFRVLGT  | PNEQWPSVVE | LRDWFPILIP    | LGCKLLEMLQ  | LDPRITAAQA  | LRHPFF 226 |
| Arath_CDKB2;1  | AIFQGDSEIQ | QLRIFRLLGT  | PNEEWPGVST | LKNWYPLAVP    | LGVDLLKMLQ  | YEPRISAKMA  | MEHPYF 226 |
| Arath_CDKB2;2  | AIFAGDSEIQ | QLRIFRLLGT  | PNEEWPGVSK | LKDWFYPLAVP   | LGLDLLKMLE  | YEPRISAKKA  | MEHPYF 226 |
| Chlre_CDKB     | PLFPGDSEYQ | QLHIFKLLGT  | PSEDWPGVTK | LRDWPLIFP     | LGIDLMRCFA  | YDPRISAKEA  | LNHPYF 226 |
| Arath_CDKB1;1  | ALFPGDSEFQ | QLHIFRLLGT  | PTAQWPGVST | LRDWYPLAVP    | LGVDLLKMLQ  | YNPRISAKTA  | LDHPYF 226 |
| Arath_CDKB1;2  | ALFPGDSEFQ | QLHIFRLLGT  | PTAQWPGVMA | LRDWYPLAVP    | LGIDLLQMLK  | YNPRISAKAA  | LDHPYF 226 |
| Miccp_CDKB     | PLFPGDSEIQ | QLHIFKLLGT  | PSEDWPGVTR | LRDWYPLVIP    | LGIDLLKMLV  | YDPRIHATEA  | LEHPYF 226 |
| Micpu_CDKB     | PLFPGDSEIQ | QLHVFLLGT   | PSEEWPGVTR | LRDWYPLVIP    | LGIDLMKMLV  | YDPRIHATEA  | LEHPYF 226 |
| Ostlu_CDKB     | PLFPGDSEIQ | QLHIFKLLGT  | PSEQWPGVSN | LRDWYPLVIP    | LGIDLLKMLV  | YDPRIHATEA  | LEHPYF 226 |
| Ostta_CDKB     | PLFPGDSEIQ | QLHIFKLLGT  | PSEQWPGVSN | LRDWYPLVIP    | LGIDLLKMLV  | YDPRIHATEA  | LEHPYF 226 |
| Cyame_CDKA     | ALFPGDSEID | QLKIFRALGT  | PSEEWPGVSQ | LPDYFPIVLA    | GALDLLRLLV  | YDPRITARQA  | LMHPYF 226 |
| Physo_CDKA2    | PLFTGDSEID | QLRIFRTLGT  | PNESWPGVTK | LRDYFPLLP     | LGLHLLSMLR  | YDPRISAKEA  | LRHPYF 226 |
| Ectsi_CDKBlike | PMFPGDSEID | EIKIFRVLGT  | PTESWPNVTD | LDDWFFLEYA    | LGINMLQLLA  | YDPRISAKRA  | LKHPFF 226 |
| Nanga_CDKA2    | AMFQGDSEVD | QLKIFRSLGT  | PSEEWPGVTA | LQDWFFLYCP    | IGLDLLKLVV  | LDPRISAKTA  | LYHAFY 226 |
| Ectsi_CDKB     | PLFPGDSEID | EIKIFRLLGT  | PNEEWPNVTD | LQDWFFLRSQ    | MGLDLLKLLY  | YDPRISAKRA  | LEHAFF 226 |
| Phatr_CDKA2    | PLFPGDSEID | QLKIFRQLGT  | PREDWPGVTQ | LQDWFFPVLD    | LGLELLTILA  | YDPRITAKES  | LDHAYF 226 |
| Thaps_CDKA2    | PLFPGDSEID | ELKIFRQLGT  | PNEEWPGVTA | LQDWFFPFLD    | TAVDLLRLLA  | YSPRITAKDT  | LNHPYF 226 |
| Fracy_CDKA2    | PLFPGDSEID | QLKIFRLLGT  | PNEEWPGVTH | LPDWFFPVTE    | LGMDLLRFLF  | YDPRITAKDS  | LNHPYF 226 |
| Nanga_CDKA1;2  | PLFPGDSEID | ELRIFRVLGT  | PNDWPKVTE  | LPNYFPLNVS    | LGLDLLRLLT  | YEPRI TCREA | QDHAYF 226 |
| Physo_CDKA1;2  | PLFPGDSEID | ELRIFRVLGT  | PNEAWPGVST | LPDYFPLVVP    | LGLDLLRLLV  | YDPRISARAA  | MSHPWF 226 |
| Sacce_CDC28    | PISFGDSEID | QIKIFRVLGT  | PNEAWPDIVY | LPDFFPLVVP    | LGIDLLKLLA  | YDPRISARRA  | AIHPYF 226 |
| Ectsi_CDKA     | PLLTGTSESD | QLRIFRQMG   | PTPIYPLQGE | LPDY - - VGGP | AYTKLMRRIR  | WGEDSNSDEE  | VSKPAL 187 |
| Nanga_CDKA1;1  | PLFAGSSESD | QLRIFRALGT  | PTGYPGVIVE | LPEFFPWLVV    | LGIDLLKMLT  | FDPRVSARDA  | LSHPFF 226 |
| Physo_CDKA1;1  | PLFAGTSEAD | QLRIFRLLGT  | PTMEYPAIID | LPEYFPLVLP    | LGVDLLQMLQ  | YDPRITAAQA  | MAHPYF 226 |
| Thaps_CDKA1    | PLIAGTSEGD | QLRIFRLLGT  | PSPAFPGIVD | LPEYLPFLVP    | LGVDLLKMLQ  | YDPRITANDA  | LKHPFF 226 |
| Phatr_CDKA1    | PLVAGTSEAD | QLRIFRLLGT  | PKLEYPTINE | LPEYMPLLVP    | LGIDLLRMLQ  | YDPRITAQAA  | LEHEYF 226 |
| Fracy_CDKA1    | PLVAGTSEDD | QLRIFRLLGT  | PKPSFPGIVD | LPDWYPLLVV    | LGIELLLMLQ  | YDPRITAQDA  | LQHRFF 226 |
| Drome_CDK2     | PLFQGDSEID | QLRMFRILKT  | PTEDWPGVTS | LPDYFPLQLK    | LGIDLIKMLI  | YDPRISAKDI  | LEHPYF 226 |
| Xenla_CDK1     | PLFHGDSEID | QLRIFRALGT  | PNNWPEVES  | LQDYFPLNVK    | IGLDLLKMLI  | YDPRISAKRA  | LLHPYF 226 |
| Homsa_CDK1     | PLFHGDSEID | QLRIFRALGT  | PNNWPEVES  | LQDYFPLHVK    | LGLDLLKMLI  | YDPRISGKMA  | LNHPYF 226 |
| Schpo_CDC2     | PLFPGDSEID | EIKIFQVLGT  | PNEEWPGVTL | LQDYFPLVVP    | GAIELLAMLV  | YDPRISAKRA  | LQPNYL 226 |
| Xenla_CDK2     | ALFPGDSEID | QLRIFRTLGT  | PDEVWPGVTT | MPDYFPFVVP    | LGRDLLQMLQ  | YDSRISAKVA  | LTHPFF 226 |
| Homsa_CDK2     | ALFPGDSEID | QLRIFRTLGT  | PDEVWPGVTS | MPDYFPFVVP    | LGRSLLQMLH  | YDPRISAKAA  | LAHPFF 226 |
| Ostta_CDKA     | PLFPGDSEID | ELKIFKTLGT  | PGETWPEAKQ | LPDYFPWLCP    | LGVDLLSLLQ  | YSPRISAKYA  | TQHRWF 226 |
| Ostlu_CDKA     | PLFPGDSEID | ELKIFKILGT  | PNETWPEAQE | LPDYFPWLCP    | LGVDLLQMLQ  | YTPRISAKHA  | MQHKWF 226 |
| Miccp_CDKA     | PLFPGDSEID | ELRIFRVLGT  | PDDGWQGVQ  | LPDYFPWICP    | LGLDLLQMLQ  | YAPRISARDA  | CNHRFF 226 |
| Micpu_CDKA     | PLFPGDSEID | QLRIFRVLGT  | PDDWPAVSS  | LPDYFPWVCP    | LGIDLLSLLH  | YAPRVSAREA  | CEHRFF 226 |
| Chlre_CDKA     | PLFPGDSEID | QLKIFQLLGT  | PDEAWAGCSA | LPDFFPLAVP    | LGVDLLRMLV  | YTPRITASAA  | MEHAYF 226 |
| Arath_CDKA1    | PLFPGDSEID | QLKIFRIMGT  | PYEDWRGVTS | LPDYFPLFVP    | LGVDLLKMLL  | MDPRINARAA  | LEHEYF 226 |
